# Supplementary material
Source: Royal Society of Chemistry journal article supplement (doi:10.1039/d5fb00940e)
Supplement: d5fb00940e1.pdf [file d5fb00940e1.pdf]

## Supporting information

### Optimization of probiotic beverage made from Sohiong fruit using response surface methodology and artificial neural network- genetic algorithm hybrid model

Roshiya Nongmaithem,<sup>a</sup> Raju Sasikumar,<sup>\*a</sup> Irengbam Barun Mangang,<sup>b</sup> Selva Kumar T.,<sup>c,a</sup> Kambhampati Vivek,<sup>d</sup> and Amit K. Jaiswal<sup>\*e, f</sup>

---

<sup>a</sup> Department of Agribusiness Management and Food Technology, North-Eastern Hill University (NEHU), Tura Campus, Chasingre 794002, Tura, WGH, Meghalaya, India.

<sup>b</sup> College of Food Technology, Lamphelpat, Central Agricultural University, Imphal-795004, India.

<sup>c</sup> Vel Tech Rangarajan Dr. Sagunthala R&D Institute of Science and Technology, Chennai 600062, India.

<sup>d</sup> Department of Food Process Engineering, National Institute of Technology, Rourkela, India.

<sup>e</sup> School of Food Science and Environmental Health, Faculty of Sciences and Health, Technological University Dublin, City Campus, Central Quad, Grangegorman, Dublin, Ireland

<sup>f</sup> Centre for Sustainable Packaging and Bioproducts (CSPB), Technological University Dublin, City Campus, Grangegorman, Dublin D07 H6K8, Ireland

---

\*Corresponding author:

Raju Sasikumar: [sashibiofoodster@gmail.com](mailto:sashibiofoodster@gmail.com)

Amit K Jaiswal: [amit.jaiswal@tudublin.ie](mailto:amit.jaiswal@tudublin.ie)

**Table S1. Analysis of variance (ANOVA) for the quadratic model**

| <b>Source</b>        | <b>Sum of Squares</b> | <b>df</b> | <b>Mean Square</b>    | <b>F-value</b> | <b>p-value</b> |
|----------------------|-----------------------|-----------|-----------------------|----------------|----------------|
| <b>Model</b>         | 51.77                 | 9         | 5.75                  | 13.81          | 0.0011 **      |
| <b>A</b>             | $1.51 \times 10^{-3}$ | 1         | $1.51 \times 10^{-3}$ | 0.0036         | 0.9536         |
| <b>B</b>             | $1.01 \times 10^{-3}$ | 1         | $1.01 \times 10^{-3}$ | 0.0024         | 0.9621         |
| <b>C</b>             | 50.80                 | 1         | 50.80                 | 122.00         | <0.0001 **     |
| <b>A<sup>2</sup></b> | 0.44                  | 1         | 0.44                  | 1.06           | 0.3382         |
| <b>B<sup>2</sup></b> | 0.099                 | 1         | 0.099                 | 0.24           | 0.6409         |
| <b>C<sup>2</sup></b> | 0.21                  | 1         | 0.21                  | 0.52           | 0.4961         |
| <b>AB</b>            | 0.11                  | 1         | 0.11                  | 0.25           | 0.6300         |
| <b>AC</b>            | $8.10 \times 10^{-3}$ | 1         | $8.10 \times 10^{-3}$ | 0.019          | 0.8930         |
| <b>BC</b>            | 0.017                 | 1         | 0.017                 | 0.041          | 0.8461         |
| <b>Residual</b>      | 2.92                  | 7         | 0.42                  |                |                |
| <b>Lack of Fit</b>   | 1.51                  | 3         | 0.50                  | 1.42           | 0.3597 ns      |
| <b>Pure Error</b>    | 1.41                  | 4         | 0.35                  |                |                |

\*\* indicates significance at  $p < 0.01$

ns indicates not significant ( $p > 0.05$ )

**Table S2. Design matrix and experimental responses for the selected parameters**

| Std | Run | Temperature (°C) | Strain | Inoculation period (h) | Inoculum size (CFU/mL) | D1 | D2 | D3 | D4 | D5 | D6 | D7 | TPC (mg GAE/g) | TAC (mg C3GE/100 mL) | DPPH (%) | TFC (mg QE/100 mL) |
|-----|-----|------------------|--------|------------------------|------------------------|----|----|----|----|----|----|----|----------------|----------------------|----------|--------------------|
| 11  | 1   | 35.00            | B      | 24.00                  | $4 \times 10^6$        | -1 | 1  | 1  | 1  | -1 | 1  | 1  | 160.00         | 223.11               | 66.24    | 172.67             |
| 7   | 2   | 35.00            | B      | 72.00                  | $8 \times 10^6$        | -1 | 1  | 1  | -1 | 1  | -1 | -1 | 164.21         | 224.51               | 66.94    | 183.45             |
| 8   | 3   | 35.00            | L      | 72.00                  | $8 \times 10^6$        | 1  | -1 | 1  | 1  | -1 | 1  | -1 | 169.62         | 227.09               | 67.43    | 181.83             |
| 5   | 4   | 37.00            | B      | 24.00                  | $8 \times 10^6$        | 1  | -1 | 1  | -1 | -1 | -1 | 1  | 158.00         | 226.67               | 70.17    | 179.56             |
| 2   | 5   | 37.00            | B      | 24.00                  | $8 \times 10^6$        | -1 | -1 | -1 | 1  | 1  | 1  | -1 | 158.00         | 226.67               | 70.17    | 179.56             |
| 1   | 6   | 37.00            | L      | 72.00                  | $4 \times 10^6$        | -1 | -1 | 1  | 1  | 1  | -1 | 1  | 157.70         | 227.83               | 70.81    | 183.62             |
| 6   | 7   | 37.00            | B      | 72.00                  | $4 \times 10^6$        | 1  | 1  | -1 | 1  | -1 | -1 | -1 | 156.49         | 225.61               | 70.02    | 177.03             |
| 12  | 8   | 35.00            | L      | 24.00                  | $4 \times 10^6$        | -1 | -1 | -1 | -1 | -1 | -1 | -1 | 162.45         | 228.84               | 67.37    | 175.78             |
| 9   | 9   | 35.00            | L      | 24.00                  | $8 \times 10^6$        | 1  | 1  | -1 | 1  | 1  | -1 | 1  | 161.37         | 227.54               | 68.12    | 176.29             |
| 4   | 10  | 37.00            | L      | 72.00                  | $8 \times 10^6$        | -1 | 1  | -1 | -1 | -1 | 1  | 1  | 160.00         | 227.09               | 71.11    | 182.60             |
| 10  | 11  | 37.00            | L      | 24.00                  | $4 \times 10^6$        | 1  | 1  | 1  | -1 | 1  | 1  | -1 | 156.10         | 229.23               | 70.10    | 176.56             |
| 3   | 12  | 35.00            | B      | 72.00                  | $4 \times 10^6$        | 1  | -1 | -1 | -1 | 1  | 1  | 1  | 161.20         | 226.74               | 65.34    | 180.50             |

D1–D7 represent coded independent variables; TPC = Total Phenolic Content (mg gallic acid equivalents per gram); TAC = Total Anthocyanin Content (mg cyanidin-3-glucoside equivalents per 100 mL); DPPH = DPPH radical scavenging activity (%); TFC = Total Flavonoid Content (mg quercetin equivalents per 100 mL).
